# Supplementary material for: Partial response to first generation SSA guides the choice and predict the outcome of second line therapy in acromegaly
Source: Springer Nature journal article supplement (doi:10.1007/s12020-022-03158-w), 2022-08-20

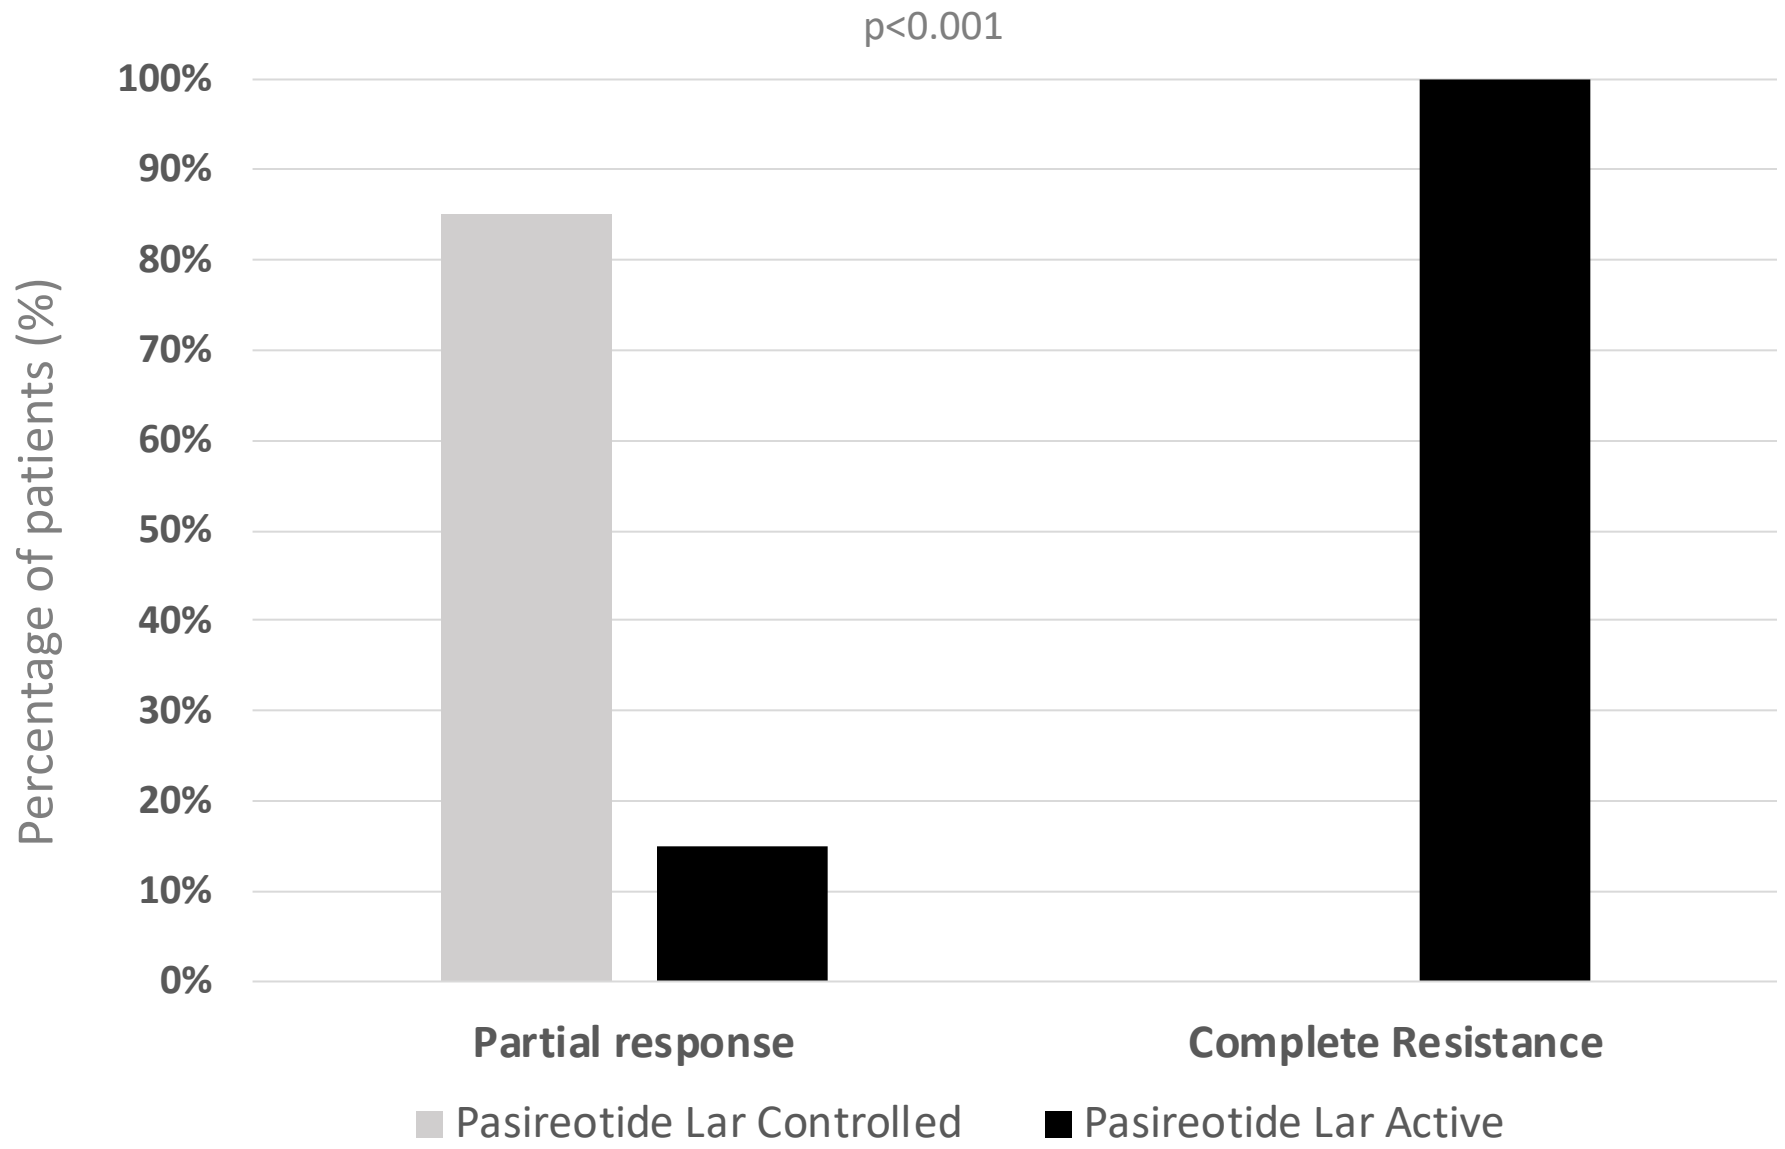

Supplement: MOESM2 [file 23383948]
